# Supplementary material for: Toxicity of innovative anti-fouling nano-based solutions to marine species
Source: Royal Society of Chemistry journal article supplement (doi:10.1039/c9en00011a), 2019-01-01
Supplement: c9en00011a1.pdf [file c9en00011a1.pdf]

| Test species                |                       | <i>Vibrio fischeri</i>               | <i>Isochrysis galbana</i>                         | <i>Nannochloropsis gaditana</i> | <i>Phaeodactylum tricornutum</i> | <i>Brachionus plicatilis</i> | <i>Mytilus galloprovincialis</i> | <i>Cerastoderma edule</i> | <i>Hediste diversicolor</i>         | <i>Artemia salina</i>             | <i>Palaemon varians</i>         | <i>Paracentrotus lividus</i>       |
|-----------------------------|-----------------------|--------------------------------------|---------------------------------------------------|---------------------------------|----------------------------------|------------------------------|----------------------------------|---------------------------|-------------------------------------|-----------------------------------|---------------------------------|------------------------------------|
| <b>Tested chemicals</b>     |                       | <b>Exposure concentrations range</b> |                                                   |                                 |                                  |                              |                                  |                           |                                     |                                   |                                 |                                    |
| <b>SiNC</b>                 | mg SiNC/L             | 0.320 – 81.9                         | 0.333 – 27                                        | 0.333 – 27                      | 0.010 – 100                      | 0.500 – 8.00                 | 0.010 – 100                      | 0.100 – 100               | 1.00 – 81                           | 1 – 100                           | 0.1 – 100                       | 0.01 – 100                         |
| <b>DCOIT</b>                | mg DCOIT/L            | 0.003 – 0.819                        | 0.001 – 0.081                                     | 0.001 – 0.081                   | 0.001 – 0.081                    | 0.040 – 0.640                | 0.010 – 2.43                     | 0.010 – 10                | 0.25 – 4.00                         | 0.063 – 1                         | 0.1 – 10                        | 0.01 – 10                          |
| <b>AgNO<sub>3</sub></b>     | mg Ag <sup>+</sup> /L | 0.204 – 52.0                         | 0.019 – 1.54                                      | 0.001 – 0.050                   | 0.006 – 0.463                    | 0.318 – 5.09                 | 0.006 – 63.5                     | 0.006 – 63.5              | 0.064 – 63.5                        | 0.040 – 0.640                     | 0.064 – 63.5                    | 0.006 – 63.5                       |
| <b>SiNC-DCOIT</b>           | mg DCOIT/L            | 0.003 – 0.646                        | 0.333 – 9.00                                      | 0.003 – 0.243                   | 0.001 – 0.081                    | 0.500 – 8.00                 | 0.010 – 100                      | 0.001 – 10                | 0.500 – 8.00                        | 0.063 – 2                         | 0.1 – 10                        | 0.01 – 10                          |
| <b>SiNC-Ag</b>              | mg Ag <sup>+</sup> /L | 0.003 – 0.600                        | 0.012 – 0.980                                     | 0.067 – 1.07                    | 0.001 – 13.4                     | 0.067 – 1.07                 | 0.001 – 13.4                     | 0.001 – 13.4              | 0.013 – 13.4                        | 0.211 – 13.4                      | 0.013 – 13.4                    | 0.001 – 13.4                       |
| <b>SiNC-DCOIT-Ag</b>        | mg DCOIT/L            | 0.003 – 0.646                        | 0.259 – 7.10                                      | 0.001 – 0.064                   | 0.001 – 0.064                    | 0.395 – 6.32                 | 0.008 – 78.9                     | 0.008 – 7.89              | 0.788 – 12.6                        | 0.050 – 0.789                     | 0.079 – 7.89                    | 0.008 – 7.89                       |
|                             | mg Ag <sup>+</sup> /L | 0.003 – 0.600                        | 0.243 – 6.58                                      | 0.001 – 0.059                   | 0.001 – 0.059                    | 0.366 – 5.86                 | 0.007 – 73.1                     | 0.007 – 7.32              | 0.732 – 11.7                        | 0.050 – 0.730                     | 0.073 – 7.32                    | 0.007 – 7.32                       |
| <b>Dilution factor</b>      |                       | 2                                    | 3                                                 | 3<br>(apart from SA=2)          | 3<br>(apart from SiNC; SA=10)    | 2                            | 10<br>(apart from DCOIT=3)       | 10                        | 2<br>(apart from SiNC=3; Ag; SA=10) | 2<br>(apart from SiNC; SA=10)     | 10                              | 10                                 |
| <b>number of treatments</b> |                       | 9                                    | 5 (apart from SD; SDA=4)                          | 5                               | 5                                | 5                            | 5 (apart from DCOIT=6)           | 4 (apart from Ag; SA=5)   | 5 (apart from Ag; SA=4)             | 5 (apart from Ag and SD=6; SDA=7) | 4 (apart from DCOIT; SD; SDA=3) | 5 (apart from DCOIT; SD; SDA=4)    |
| <b>n</b>                    |                       | 1                                    | 4                                                 | 4                               | 4                                | 3                            | 12                               | 5                         | 5                                   | 3                                 | 5                               | 4                                  |
| <b>internal replicates</b>  |                       | -                                    | -                                                 | -                               | -                                | 5                            | 1                                | 1                         | 1                                   | 10                                | 3                               | ~ 100                              |
| <b>type of vessel</b>       |                       | -                                    | 24-well microplate                                | 24-well microplate              | 24-well microplate               | 24-well microplate           | 6-well microplate                | 200 mL glass flask        | 200 mL glass flask                  | 24-well microplate                | 200 mL glass flask              | 24-well microplate                 |
| <b>tested volume</b>        |                       | -                                    | 2000 µL<br>(1980 µL microalgae + 20 µL treatment) |                                 |                                  | 300 µL                       | 10 mL                            | 150 mL                    | 150 mL                              | 1 mL                              | 150 mL                          | 2000 µL<br>(20 µL eggs suspension) |

Supplementary table 1 – Exposure concentration ranges and experimental design details for all chemical substances and all test species. SD: SiNC-DCOIT; SA: SiNC-Ag; SDA: SiNC-DCOIT-Ag.

| Nanomaterial  | Concentration (mg/L) | Time (h) | pH   | Low ionic strength media |       |           |      | High ionic strength media |      |
|---------------|----------------------|----------|------|--------------------------|-------|-----------|------|---------------------------|------|
|               |                      |          |      | $\zeta$ P (mV)           |       | Size (nm) |      | Size (nm)                 |      |
|               |                      |          |      | Mean                     | SD    | Mean      | SD   | Mean                      | SD   |
| SiNC          | 0.001                | 0        | 6.43 | -17.4                    | 0.681 | 438       | 46.8 | 517                       | 105  |
|               |                      | 24       | 6.68 | -19.0                    | 1.08  | 534       | 278  | 472                       | 62.1 |
|               |                      | 48       | 7.09 | -20.1                    | 0.624 | 496       | 120  | 514                       | 71.2 |
|               | 0.1                  | 0        | 6.53 | -13.6                    | 0.557 | 418       | 122  | 708                       | 132  |
|               |                      | 24       | 6.75 | -18.5                    | 3.20  | 698       | 158  | 628                       | 181  |
|               |                      | 48       | 7.00 | -19.6                    | 0.702 | 569       | 88.8 | 549                       | 96.3 |
|               | 10                   | 0        | 6.49 | -11.8                    | 1.33  | 180       | 51.0 | 467                       | 191  |
|               |                      | 24       | 6.63 | -12.4                    | 1.07  | 252       | 86.7 | 652                       | 175  |
|               |                      | 48       | 7.07 | -11.2                    | 0.872 | 251       | 80.9 | 704                       | 114  |
| SiNC-DCOIT    | 0.001                | 0        | 6.26 | -9.90                    | 1.45  | 229       | 118  | 202                       | 130  |
|               |                      | 24       | 6.36 | -9.40                    | 0.460 | 234       | 100  | 531                       | 53.7 |
|               |                      | 48       | 6.66 | -11.5                    | 1.44  | 473       | 164  | 541                       | 41.7 |
|               | 0.1                  | 0        | 5.99 | -9.40                    | 3.40  | 443       | 31.3 | 482                       | 284  |
|               |                      | 24       | 6.03 | -6.80                    | 2.43  | 444       | 40.9 | 514                       | 24.0 |
|               |                      | 48       | 6.31 | -11.1                    | 4.20  | 592       | 15.4 | 547                       | 12.7 |
|               | 10                   | 0        | 6.15 | -4.30                    | 0.32  | 423       | 19.8 | 259                       | 195  |
|               |                      | 24       | 6.19 | -6.10                    | 1.42  | 328       | 44.1 | 509                       | 31.0 |
|               |                      | 48       | 6.41 | -6.36                    | 1.07  | 367       | 74.8 | 542                       | 46.1 |
| SiNC-Ag       | 0.001                | 0        | 6.26 | -9.90                    | 1.45  | 229       | 118  | 149                       | 16.3 |
|               |                      | 24       | 5.90 | -3.57                    | 0.364 | 340       | 50.7 | 107                       | 16.3 |
|               |                      | 48       | 5.75 | -4.83                    | 0.601 | 280       | 26.7 | 111                       | 16.7 |
|               | 0.1                  | 0        | 6.12 | -3.80                    | 0.356 | 324       | 86.3 | 350                       | 27.8 |
|               |                      | 24       | 5.88 | -3.21                    | 0.686 | 360       | 24.9 | 81.4                      | 4.02 |
|               |                      | 48       | 5.81 | -4.04                    | 0.450 | 404       | 57.2 | 144                       | 14.4 |
|               | 10                   | 0        | 6.14 | -3.84                    | 0.511 | 232       | 39.3 | 573                       | 24.1 |
|               |                      | 24       | 5.90 | -3.16                    | 0.188 | 249       | 24.6 | 128                       | 20.6 |
|               |                      | 48       | 5.81 | -3.71                    | 0.474 | 234       | 32.8 | 235                       | 36.8 |
| SiNC-DCOIT-Ag | 0.001                | 0        | 5.84 | -8.36                    | 246   | 22.4      | 246  | 309                       | 20.3 |
|               |                      | 24       | 6.32 | -7.34                    | 320   | 60.5      | 320  | 363                       | 7.53 |
|               |                      | 48       | 6.56 | -7.02                    | 490   | 12.9      | 490  | 251                       | 22.5 |
|               | 0.1                  | 0        | 5.81 | -6.83                    | 282   | 4.32      | 282  | 501                       | 71.6 |
|               |                      | 24       | 6.16 | -8.55                    | 380   | 45.0      | 380  | 445                       | 10.2 |
|               |                      | 48       | 6.05 | -8.04                    | 416   | 71.3      | 416  | 286                       | 15.0 |
|               | 10                   | 0        | 5.78 | -6.76                    | 272   | 13.7      | 272  | 285                       | 35.2 |
|               |                      | 24       | 6.05 | -8.47                    | 248   | 17.0      | 248  | 444                       | 38.7 |
|               |                      | 48       | 6.13 | -7.63                    | 338   | 7.85      | 338  | 325                       | 33.6 |

Supplementary table 2 – Average hydrodynamic particle size (n =3), presented as intensity distribution, of each nanomaterial tested (SiNC, SiNC-DCOIT, SiNC-Ag and SiNC-DCOIT-Ag) dispersed in low and high ionic strength media (ultra-pure water and artificial saltwater, respectively) in time (0, 24 and 48 h). Zeta potential values values ( $\zeta$ P, mV) are also provided for UP water. SD – standard deviation.

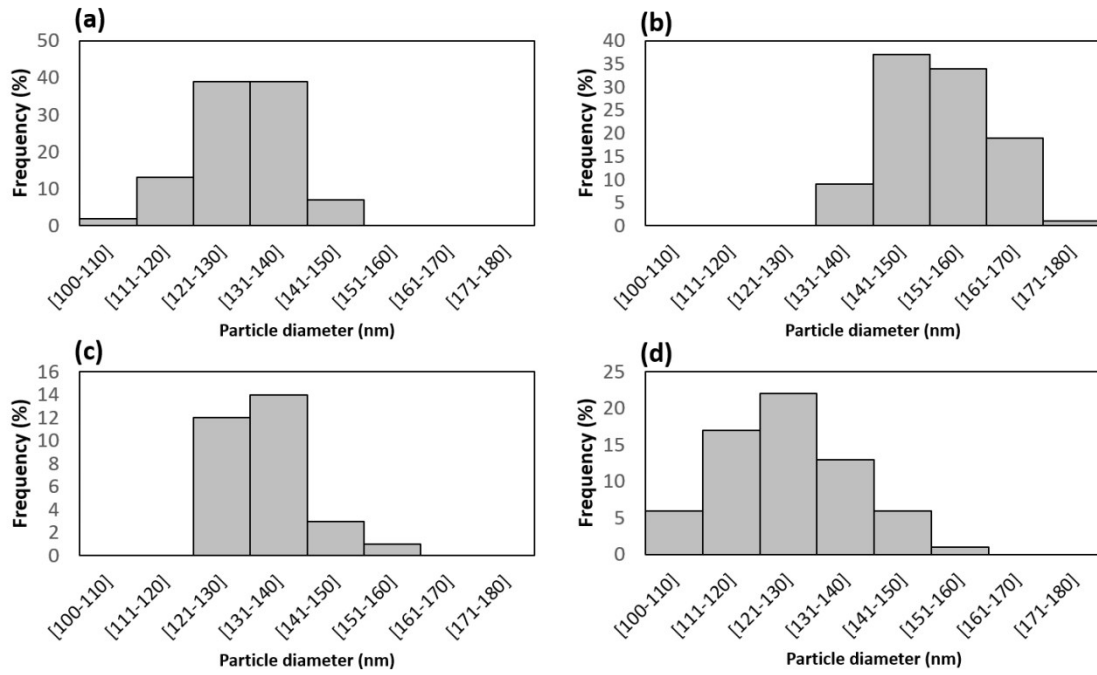

Supplementary figure 1 – Nanoparticles size frequency histograms based on SEM measurements of (a) empty SiNC, (b) SiNC with DCOIT encapsulated, (c) SiNC coated with silver and (d) SiNC with DCOIT encapsulated and coated with silver.

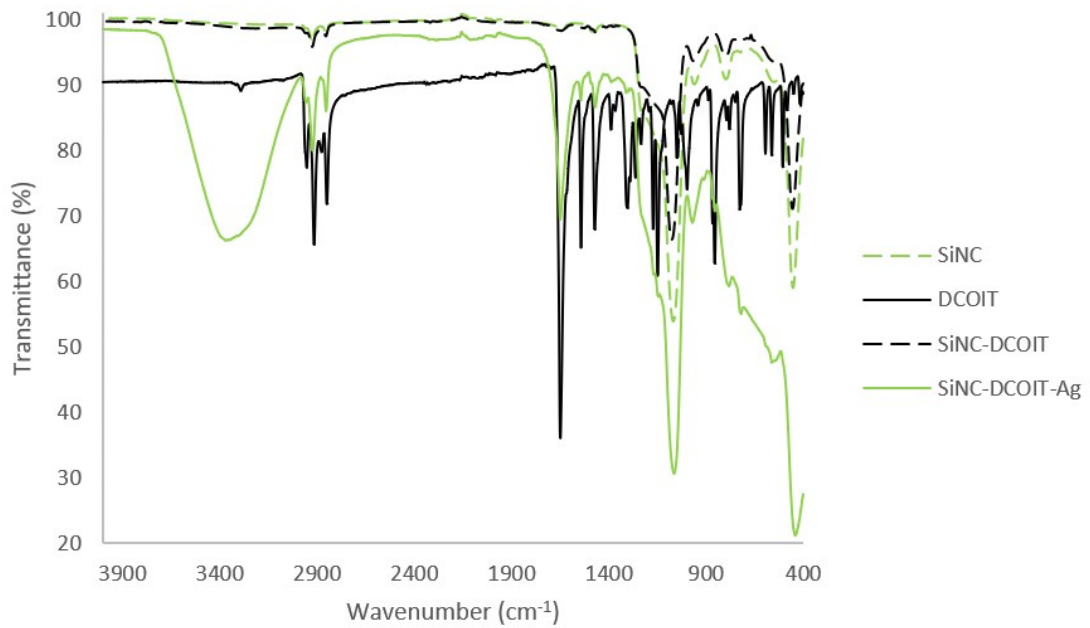

Supplementary figure 2 – FTIR spectrum of SiNC, DCOIT, SiNC-DCOIT, and SiNC-DCOIT-Ag.

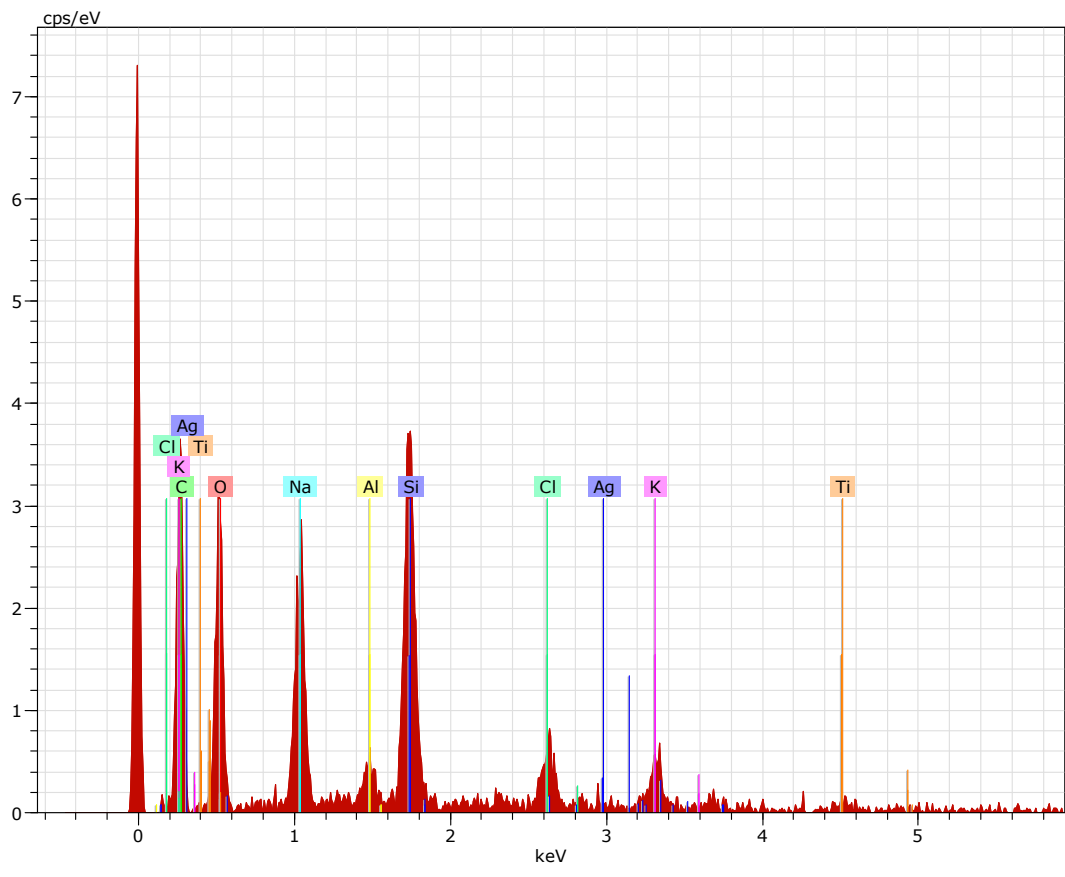

Supplementary figure 3 – Energy Dispersive X-Ray Spectroscopy (EDS) of SiNC-DCOIT-Ag, showing the presence of Si and O (present in the SiNC), Ag (regarding the coating with silver) and Cl (representative of DCOIT).

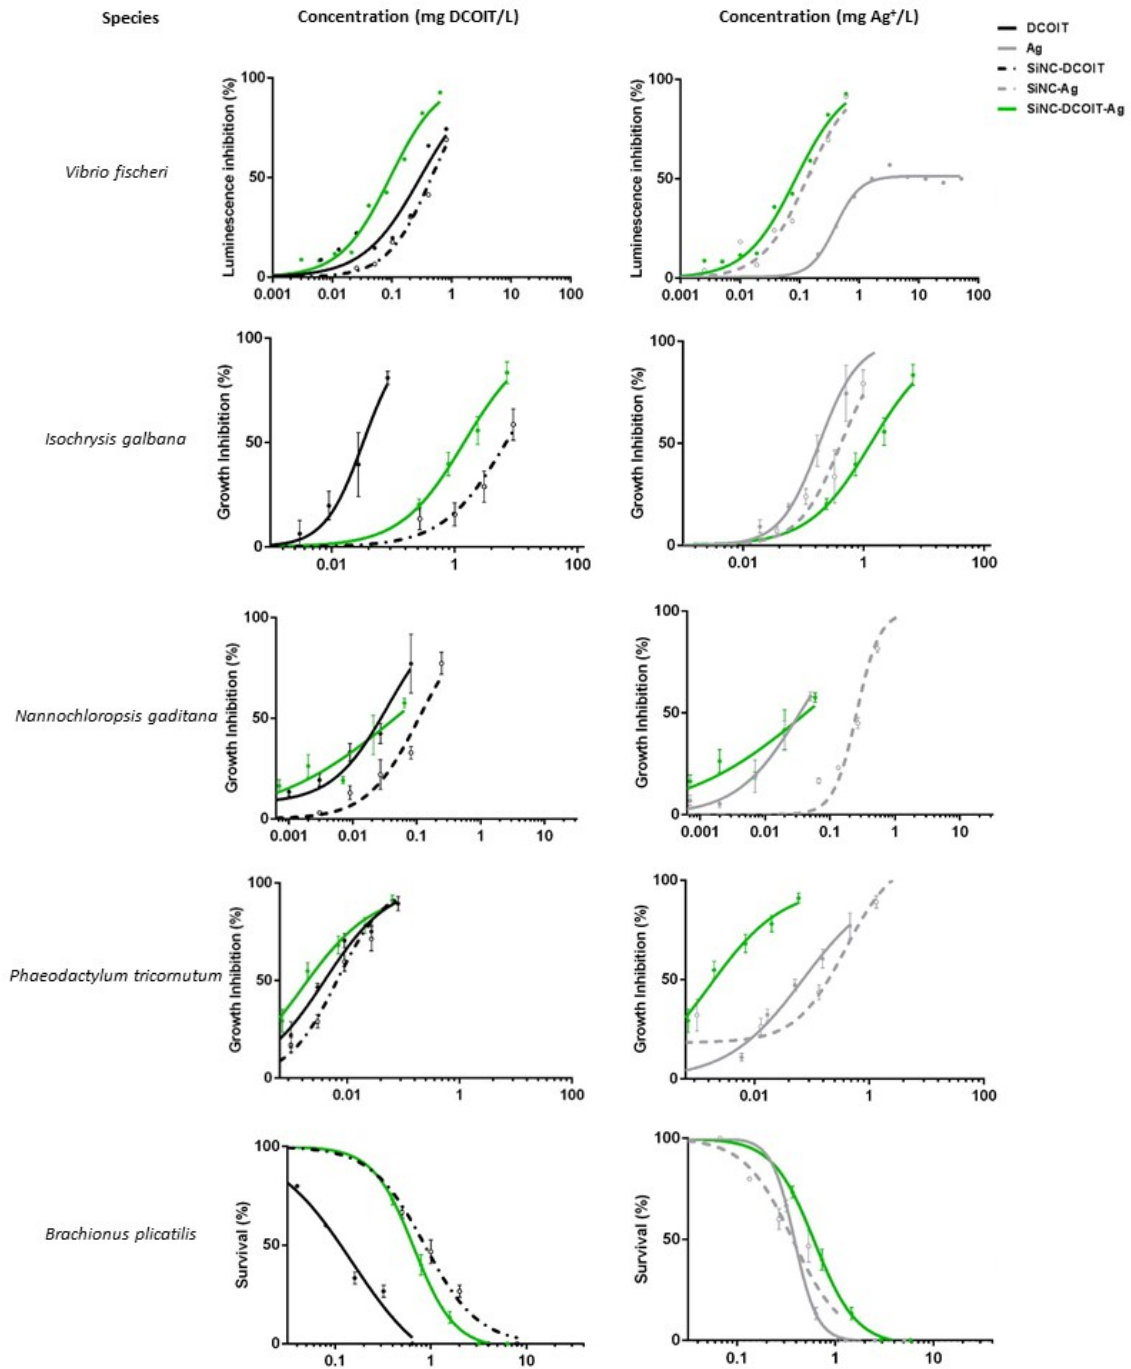

Supplementary figure 4 – Dose-response curves of the bacteria *Vibrio fischeri* luminescence inhibition, growth inhibition of three photosynthetic species and rotifer *Brachionus plicatilis* survival exposed to: (left) – DCOIT, SiNC-DCOIT and SiNC-DCOIT-Ag (both expressed as mg of DCOIT content/L); (right) Ag, SiNC-Ag and SiNC-DCOIT-Ag (both expressed as mg of Ag content/L). Data are presented as mean percentage values  $\pm$  standard error.
